# Supplementary material for: Polyglutamine toxicity in yeast induces metabolic alterations and mitochondrial defects
Source: PubMed Central journal article supplement (PMC4558792; doi:10.1186/s12864-015-1831-7), 2015-09-03

Additional file 15

BY4717

*fzo1* $\Delta$

*mgm1* $\Delta$

pQ0

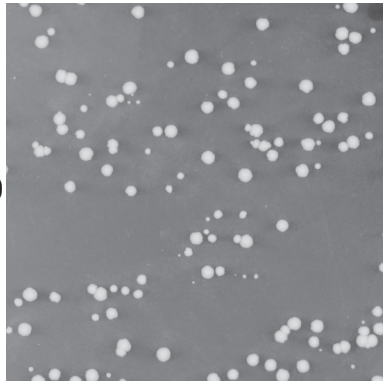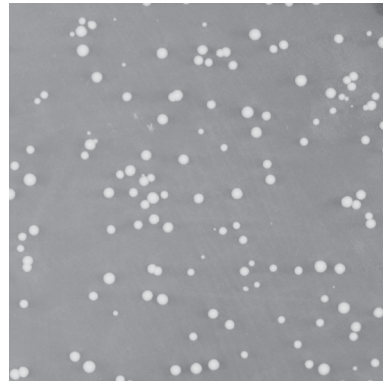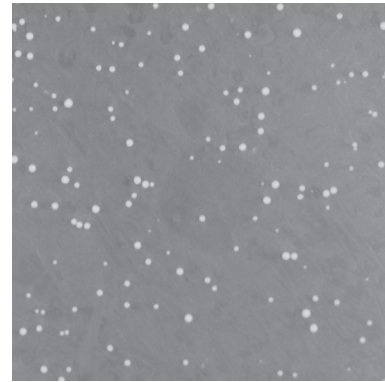

pQ56

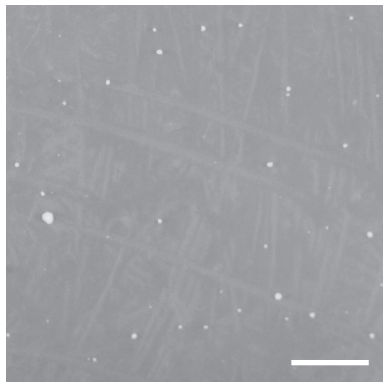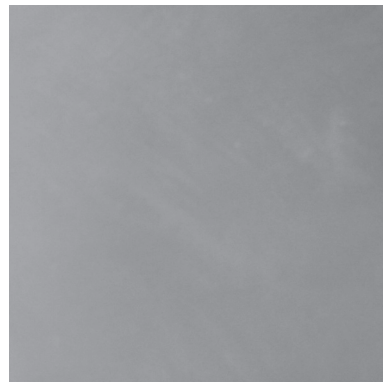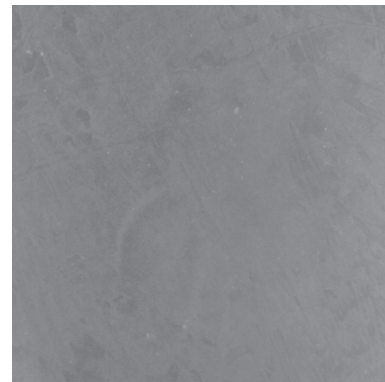

Supplement: 12864_2015_1831_MOESM15_ESM.pdf [file 12864_2015_1831_MOESM15_ESM.pdf]
